# Supplementary material for: Effects of ocean acidification on the potency of macroalgal allelopathy to a common coral
Source: PubMed Central journal article supplement (PMC5286515; doi:10.1038/srep41053), 2017-02-01
Supplement: srep41053-s1.pdf [file srep41053-s1.pdf]

## Supplementary Information

### Effects of ocean acidification on the potency of macroalgal allelopathy to a common coral

Authors: Carlos Del Monaco, Mark E. Hay, Patrick Gartrell, Peter J. Mumby and Guillermo Diaz-Pulido

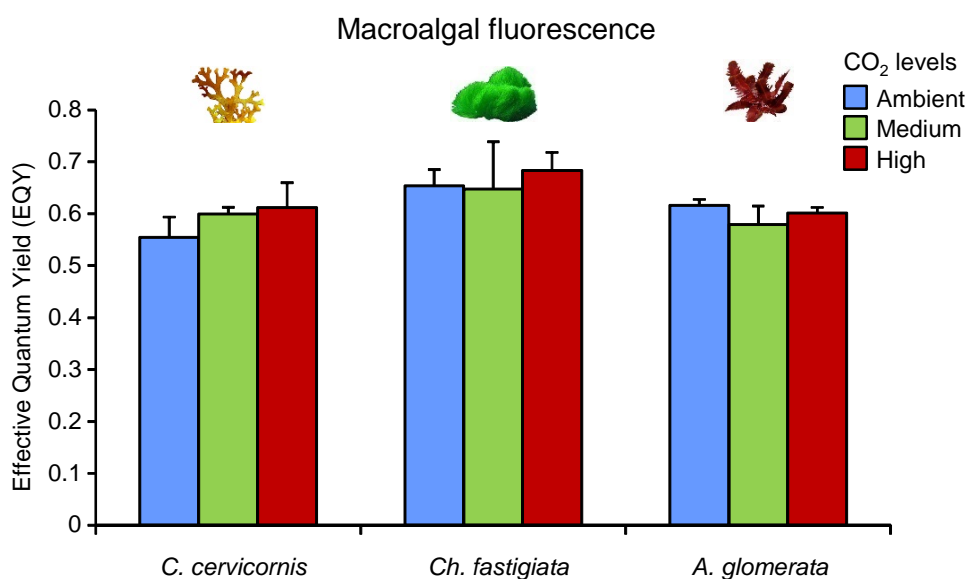

**Supplementary Figure S1.** Fluorescence values (effective quantum yield) of the macroalgae *Canistrocarpus* (= *Dictyota*) *cervicornis*, *Chlorodesmis fastigiata* and *Amansia glomerata* grown under three levels of CO<sub>2</sub>: ambient (380 ppm); medium (540 ppm) or high (936 ppm). Experiment was conducted in parallel with the first experiment. One-way ANOVA showed no significant effects of CO<sub>2</sub> (n=12, F=0.69, p=0.55).

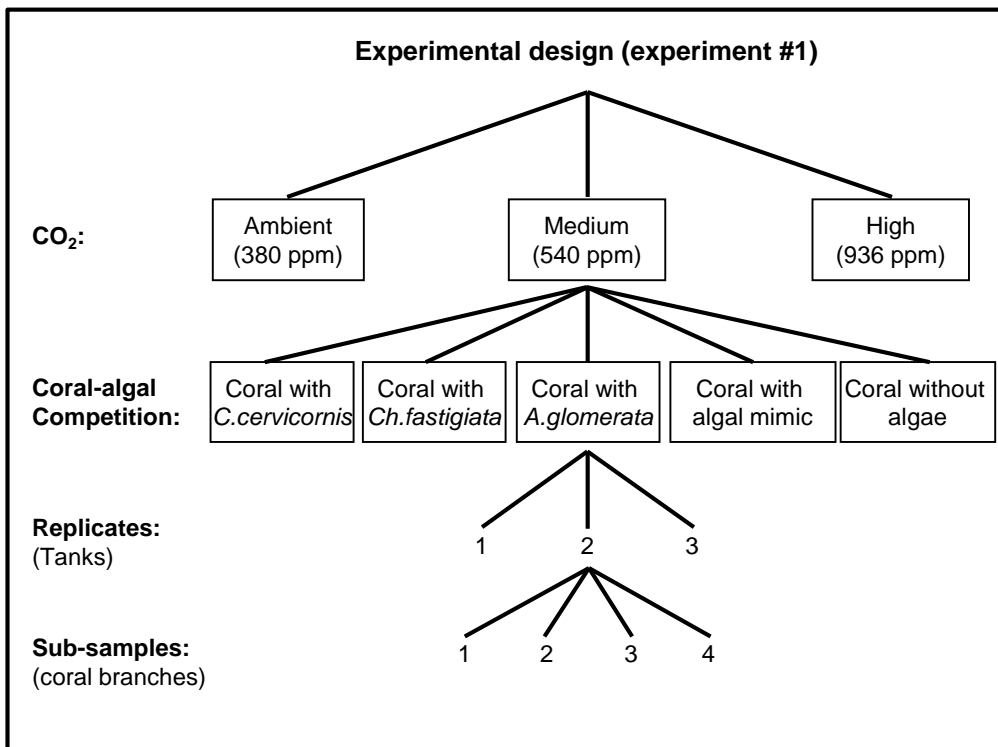

**Supplementary Figure S2.** Diagram of the Experimental design used to generate Fig. 1.
